# Supplementary material
Source: publisher figshare collection journal article supplement (https://frontiersin.figshare.com/ndownloader/files/17958080)
Supplement: Supplementary file 1 [file 17958080]

Supplementary results

Table S1: Results from an ANOVA looking at the effect of salt concentration (0, 1 or 3 g/L), exposure (acute or chronic), including their interaction, and body size (measured as head width) on the melanisation immune response in *Anax junius* larval dragonflies.

|  | DF | Sum Sq | F Value | P Value |
| --- | --- | --- | --- | --- |
| Exposure | 2 | 2085 | 2.82 | 0.065 |
| Concentration | 1 | 260 | 0.702 | 0.404 |
| Exp*Concen | 1 | 5 | 0.015 | 0.904 |
| Head width | 1 | 1216 | 3.285 | 0.074 |
